# Supplementary material for: Electrochemical determination of thiabendazole pesticide extracted and preconcentrated from tomato samples by cloud point extraction
Source: Royal Society of Chemistry journal article supplement (doi:10.1039/d0ay01918f), 2020-01-01
Supplement: d0ay01918f1.pdf [file d0ay01918f1.pdf]

Manuscript “**Electrochemical determination of thiabendazole pesticide extracted and preconcentrated from tomato samples by cloud point extraction**”, by Antonia C. Neta, Gabriela C. Ribeiro, Kamila P. De Amorim, and Leonardo S. Andrade.

## Supplementary Material

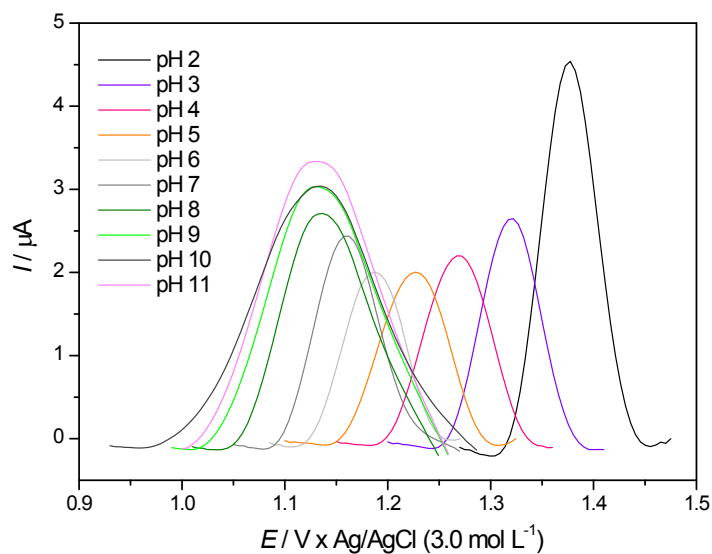

Fig. S1. DPV voltammograms obtained in the electrochemical detection of TBZ fungicide ( $1,0 \times 10^{-5} \text{ mol L}^{-1}$ ) at different pH. DPV conditions:  $a = 50 \text{ mV}$ , step potential =  $5 \text{ mV}$  and  $v = 100 \text{ mV s}^{-1}$ .

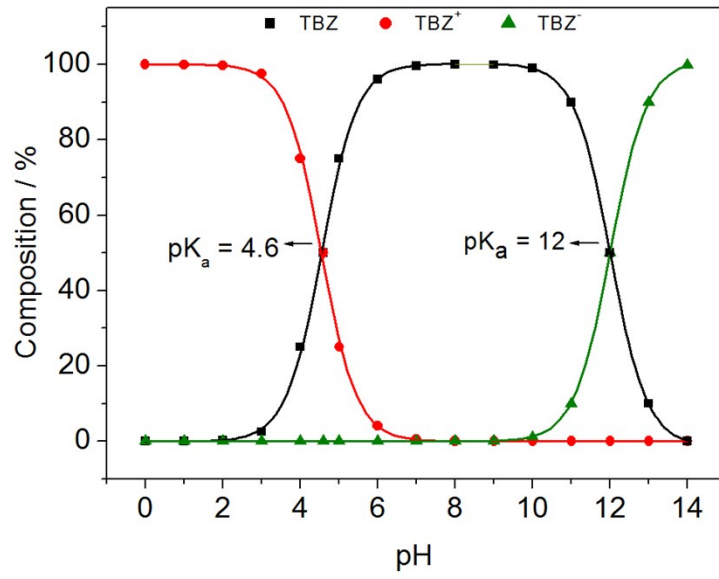

Fig.S2. Speciation diagram for TBZ. (●) TBZ<sup>+</sup>, (■) TBZ and (▲) TBZ<sup>-</sup>.

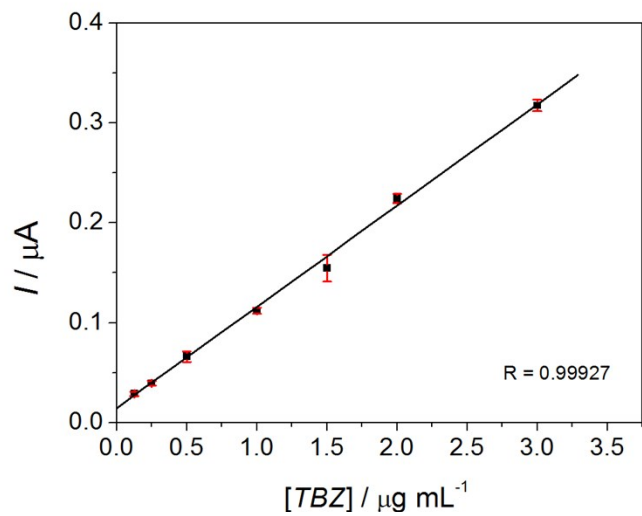

(a)

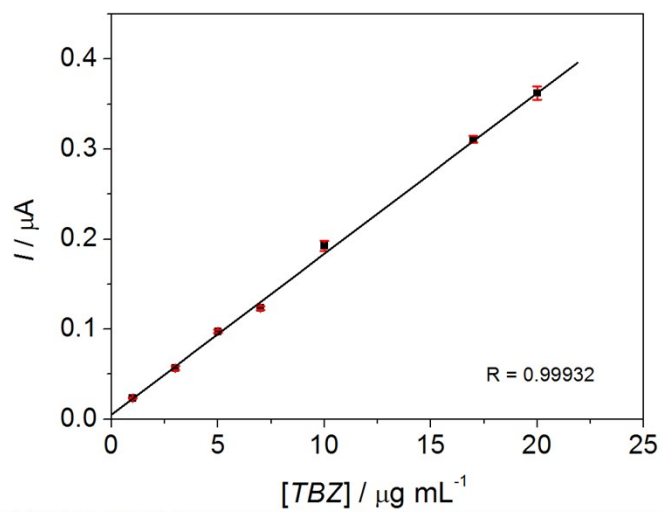

(b)

Fig. S3. Analytical curve obtained with (a) and without CPE (b) under optimized conditions: 19% (V/V) Tergitol, 0.83 g of NaCl, 36 °C and stirring time of 15 min. Supporting electrolyte (or mobile phase): Phosphate buffer (0.01 mol L<sup>-1</sup>, pH 7.0):ACN in the ratio 57:43 (V/V).  $E = 1.35 \text{ V x Ag/AgCl (3.0 mol L}^{-1}\text{)}$ .
